# Supplementary material for: A simple turn-off fluorescent chemosensor based on a Schiff base structure for ultrafast and highly selective trace detection of Cu2+ ions in aqueous solutions
Source: Royal Society of Chemistry journal article supplement (doi:10.1039/d4ay01649a), 2024-01-01
Supplement: d4ay01649a1.pdf [file d4ay01649a1.pdf]

## Supporting Information

### **A simple turn-off fluorescent chemosensor based on Schiff base structure for ultrafast and highly selective trace detection of Cu<sup>2+</sup> ions in aqueous solutions**

Jing Wang<sup>a</sup>, Lu Ren<sup>b</sup>, Qiang Sun<sup>a</sup>, Yanqi Liu<sup>a</sup>, Wanru Jia<sup>a</sup>, Huihong Zhang<sup>a</sup>, Dawei Zhang<sup>a\*</sup>

#### **1.1 Calculation of the limit of detection (LOD) values**

The LOD values were derived from fluorescence titration experiments based on a plot of fluorescence intensity and iron nitrate concentration:

$$\text{LOD} = 3\sigma/k$$

Where  $\sigma$  is the standard deviation of the blank sample and  $k$  is the slope of the line of best fit.<sup>1</sup>

#### **1.2 Cytotoxicity experiments**

Living HepG-2 cells were provided by the School of Chemical and Pharmaceutical Engineering, Jilin Institute of Chemical Engineering. Inoculate cells overnight into a 96 well cell culture plate supplemented with 10% FBS (fetal bovine serum) in DMEM at 37 °C and 5% CO<sub>2</sub> atmosphere. Various concentrations (0, 10, 20, 30, 40, 50 μM) of the probe DHP were added to the cell culture plate after the cells were washed with phosphate-buffered saline (PBS) three times. The cells were incubated overnight at 37 °C under a 5% CO<sub>2</sub> atmosphere. After incubation, the original medium was exchanged with new 100 μL 10 % FBS (fetal calf serum), followed by adding 10 μL MTT (0.5 mg/mL). After 4 h, the medium was removed, and 200 μL DMSO was added to each well. The absorbance at 570 nm was measured with a Spectramax microwell plate reader, and the cell viability towards the HepG-2 cells line were measured using the equation:<sup>2</sup>

$$\text{Cell viability (\%)} = \text{Mean absorbance (Treated cell)} / \text{Mean absorbance (Control cell)}$$

#### **1.3 Cell fluorescence imaging**

During cell imaging experiments, the cells were divided into diverse groups and imaged after different treatments. HepG-2 cells were fixed in 24-well plates, washed with PBS, and then incubated in the dark for 10 min with the addition of MTT. The probes DHP and different concentrations of  $\text{Cu}^{2+}$  ions (0, 20, 40, 60, 80, 100  $\mu\text{M}$ ) were added and incubated for 30 min, respectively. The cells of each well were washed with 3 times PBS buffer after each step. The cells were eventually fixed on a circular slide and imaged by confocal electron fluorescence microscopy.<sup>3,4</sup>

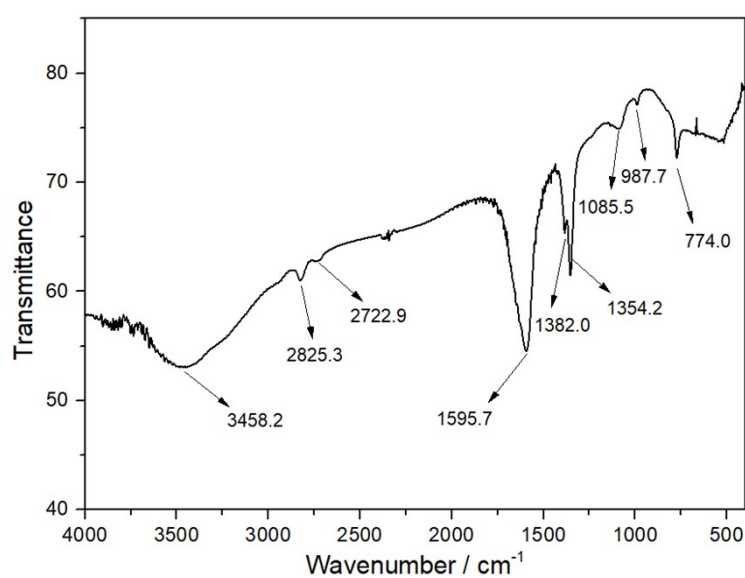

**Fig. S1** IR spectrum of DHP

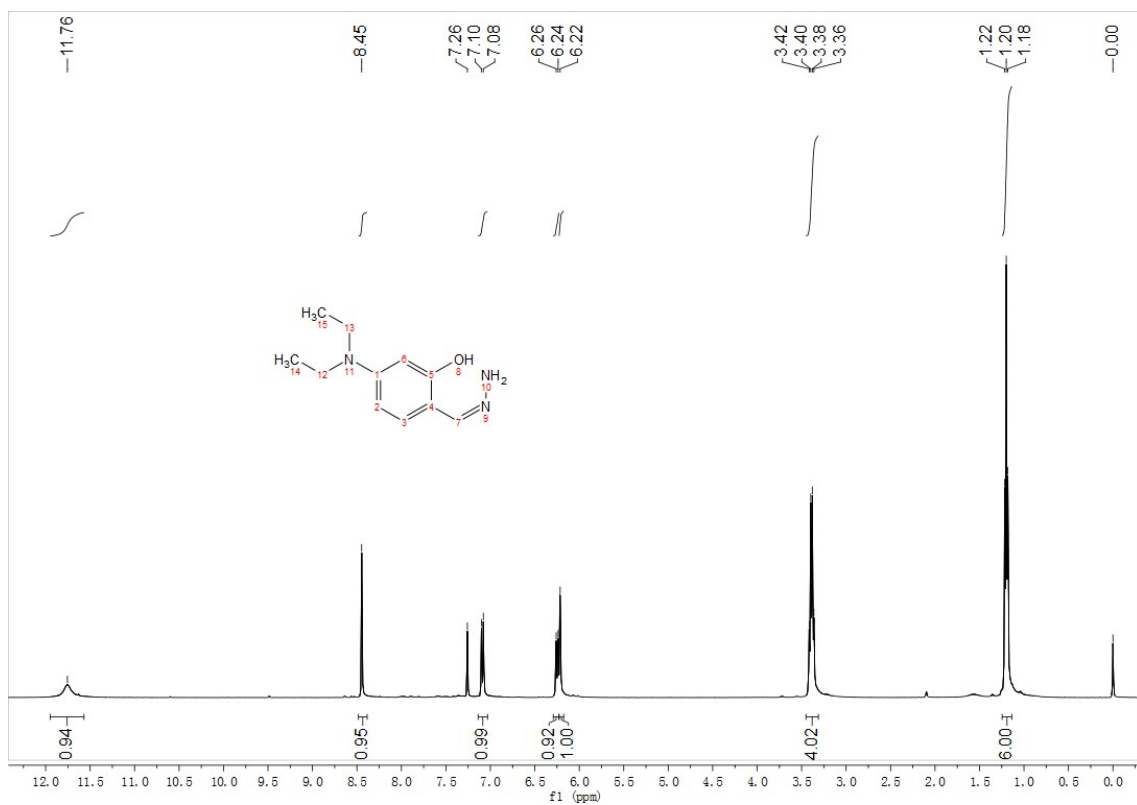

**Fig. S2** <sup>1</sup>H NMR spectrum of DHP

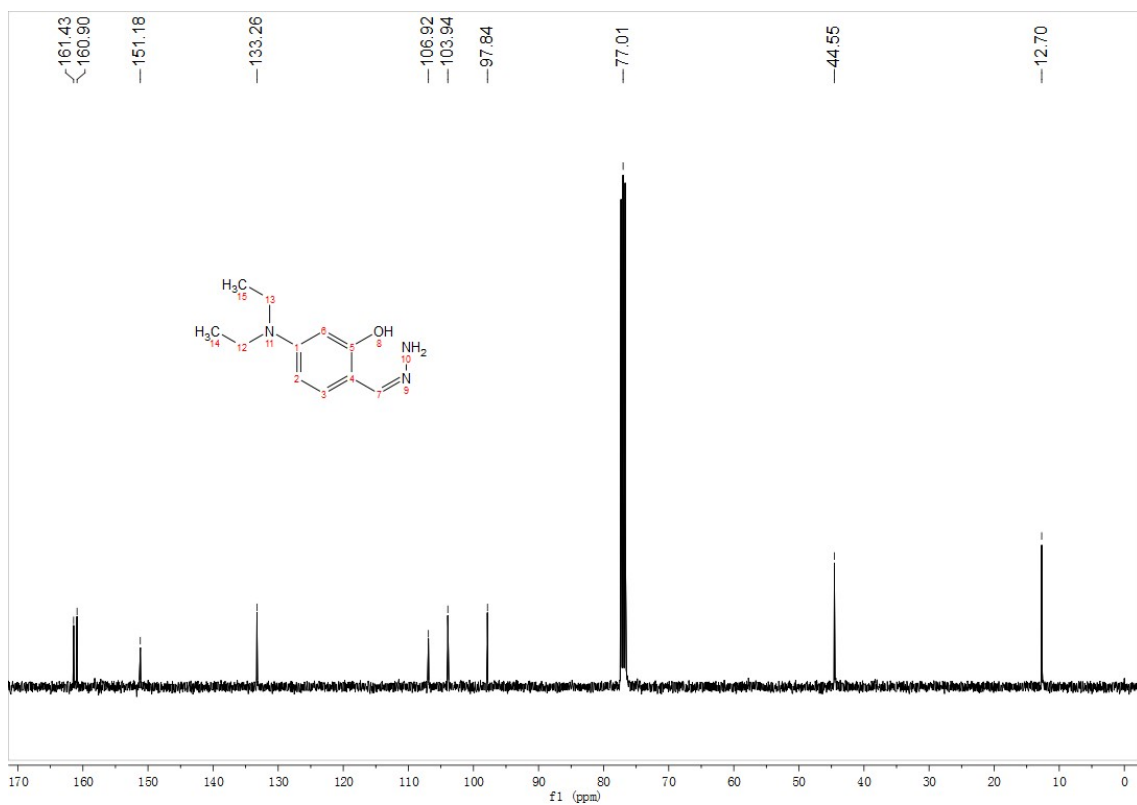

**Fig. S3** <sup>13</sup>C NMR spectrum of DHP

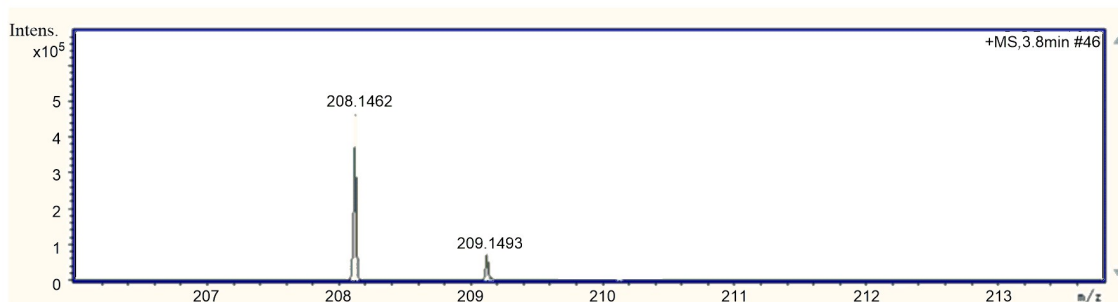

**Fig. S4** HR-MS spectrum of DHP

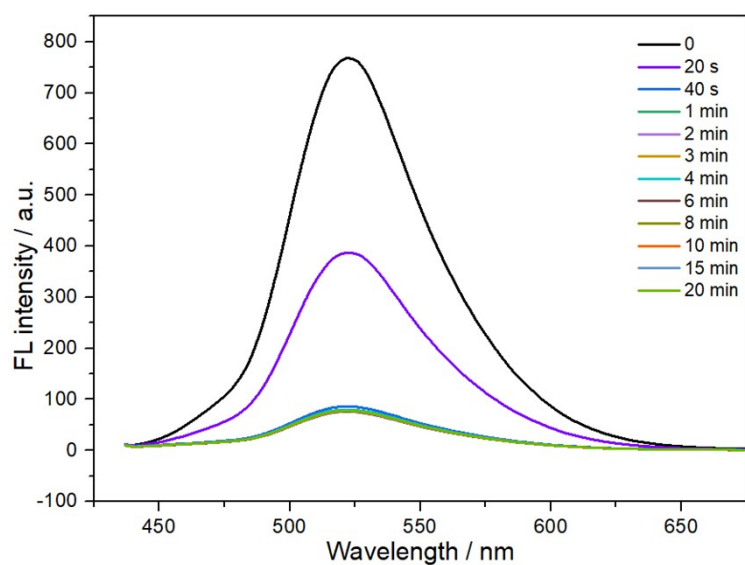

**Fig. S5** Response time and stability of probe DHP (10  $\mu$ M). Fluorescence intensity of DHP-Cu<sup>2+</sup> (10  $\mu$ M), EtOH/H<sub>2</sub>O (1:1, v/v)

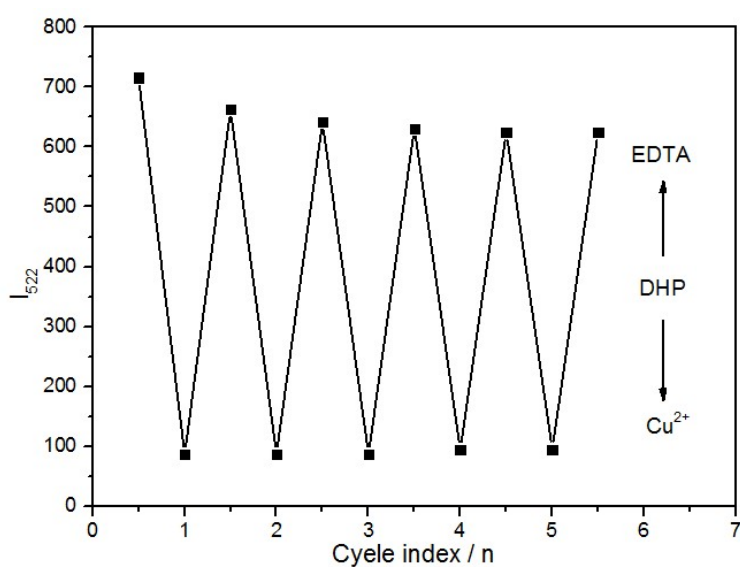

**Fig. S6.** The reversibility studies of DHP-Cu<sup>2+</sup> with EDTA.

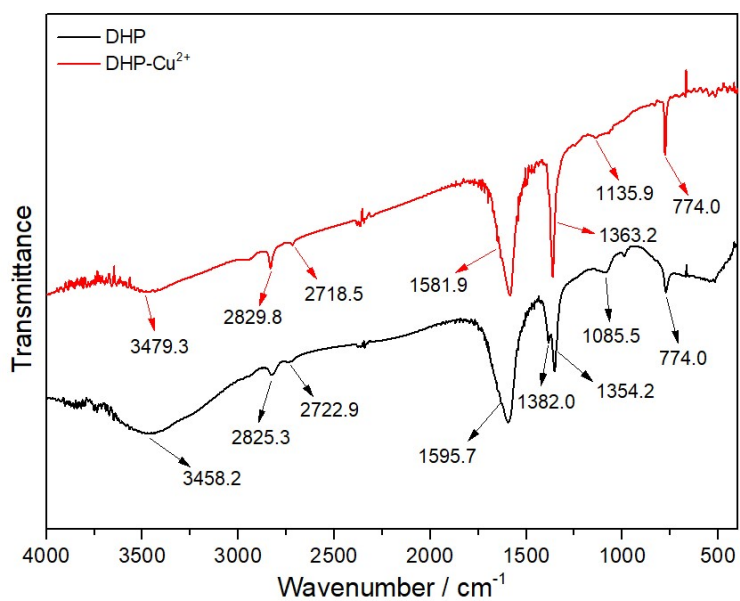

Fig. S7 IR spectrum of DHP and DHP- $\text{Cu}^{2+}$

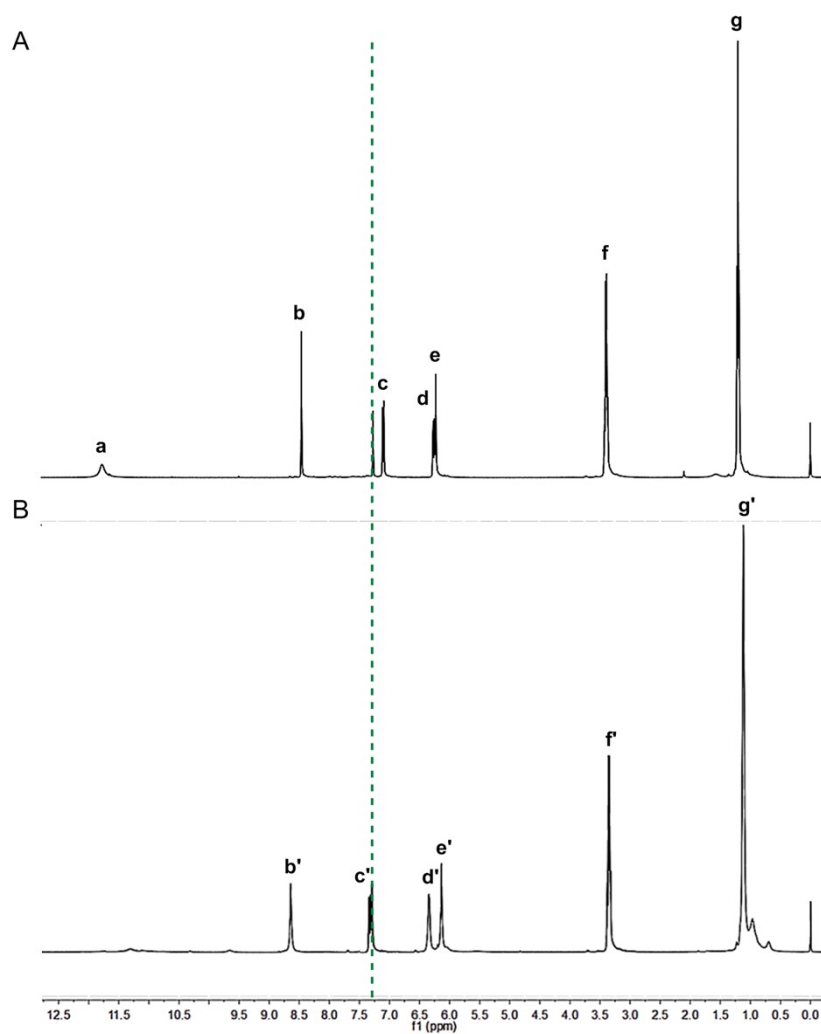

Fig. S8  $^1\text{H}$  NMR of DHP and DHP- $\text{Cu}^{2+}$  in  $\text{CDCl}_3$  (A) only DHP, (B) DHP- $\text{Cu}^{2+}$

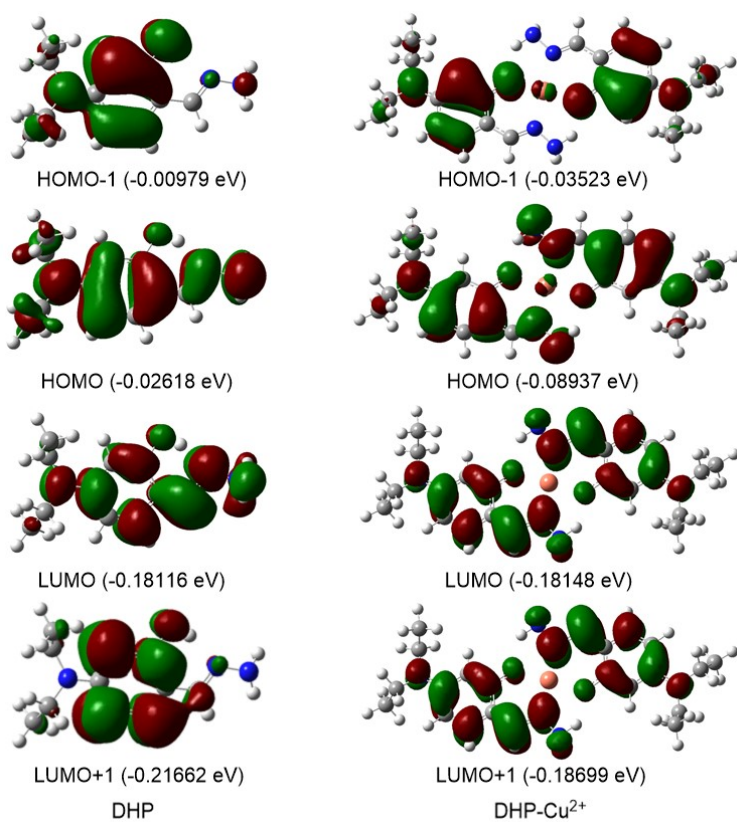

**Fig. S9** Optimized molecular configuration and frontier orbitals of DHP and DHP-Cu<sup>2+</sup>.

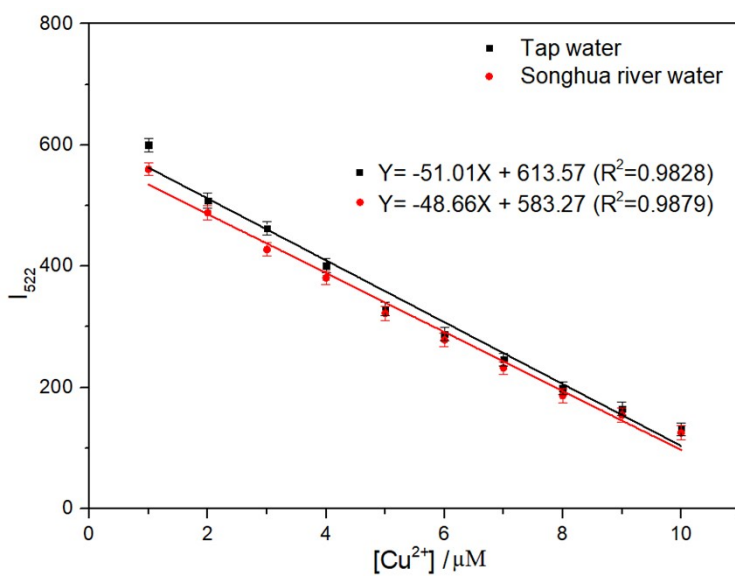

**Fig. S10** Linear curves of fluorescence response of probe DHP to Cu<sup>2+</sup> in tap water and river water.

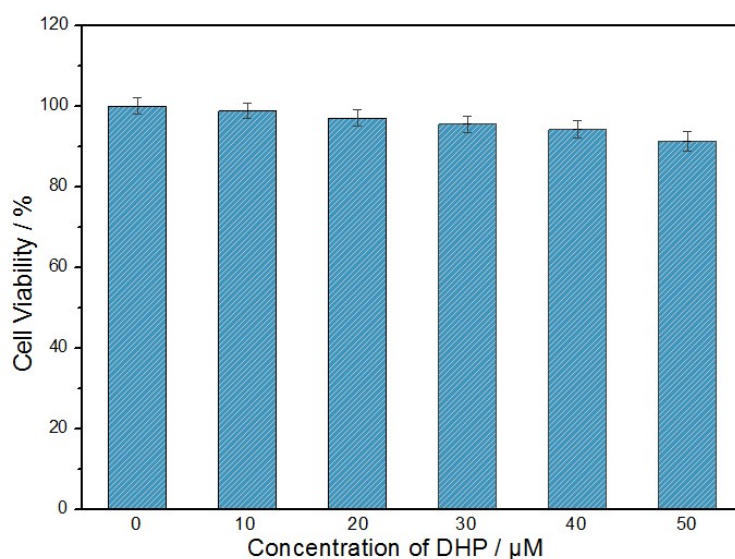

**Fig. S11** Cell viability graph of probe DHP using HepG-2 cells by MTT assay after 24 h.

**Table S1** Orbital energy differential of DHP and DHP-Cu<sup>2+</sup>.

| Compound             | $\Delta E_{H \rightarrow L}$ (A.U.) | $\Delta E_{H \rightarrow L+1}$ (A.U.) | $\Delta E_{H-1 \rightarrow L}$ (A.U.) |
|----------------------|-------------------------------------|---------------------------------------|---------------------------------------|
| DHP                  | 0.15498                             | 0.19044                               | 0.17137                               |
| DHP-Cu <sup>2+</sup> | 0.09211                             | 0.09762                               | 0.14625                               |

## Reference

- 1 X. Tang, Z. Zhu, Y. Wang, J. Han, L. Ni, H. Q. Zhang, J. Li and Y. L. Mao, A cyanobiphenyl based fluorescent probe for rapid and specific detection of hypochlorite and its bio-imaging applications, *Sens. Actuators B.*, 2018, **262**, 57–63.
- 2 J. Ahmad, R. Wahab, M. A. Siddiqui, N. N. Farshori, Q. Saquib, N. Ahmad and A. A. Al-Khedhairy, Neodymium oxide nanostructures and their cytotoxic evaluation in human cancer cells, *J. Trace. Elem. Med. Bio.*, 2022, **73**, 127029.
- 3 L. Zhou, J. Cui, Z. Yu, D. Zou, W. Zhang and J. Qian, A  $\beta$ -d-galactose-guided fluorescent probe for selectively bioimaging endogenous formaldehyde in living HepG-2 cells, *Sens. Actuators B.*, 2021, **332**, 129494.
- 4 Z. Li, J. Li, D. Zhang, X. Zhu, Y. Ye and Y. Zhao, A novel dual-channel fluorescent probe for nitroxyl detection and its application in HepG-2 cells, *Sens. Actuators B.*, 2020, **312**, 127944.
